# Supplementary material for: Design of a hydrophilic mercaptosuccinic acid-functionalized β-cyclodextrin polymer via host–guest interaction: toward highly efficient glycopeptide enrichment
Source: Royal Society of Chemistry journal article supplement (doi:10.1039/d2an01358d), 2022-01-01
Supplement: d2an01358d1.pdf [file d2an01358d1.pdf]

## Supporting information

### Design of hydrophilic mercaptosuccinic acid functionalized $\beta$ -cyclodextrin polymer via host-guest interaction: toward highly efficient glycopeptide enrichment

Binfen Zhao<sup>a</sup>, Yuxuan Wang<sup>1a</sup>, Jiutong Ma<sup>a</sup>, Qiong Jia<sup>a,b,\*</sup>

<sup>a</sup> *College of Chemistry, Jilin University, Changchun 130012, China*

<sup>b</sup> *Key Laboratory for Molecular Enzymology and Engineering of Ministry of Education, School of Life Sciences, Jilin University, Changchun 130012, China*

#### CONTENTS

|                    |      |
|--------------------|------|
| Figs. S1-S10 ..... | SI2  |
| Tables S1-S4 ..... | SI8  |
| References .....   | SI13 |

---

\* Corresponding author.

E-mail address: jiaqiong@jlu.edu.cn (Q. Jia).

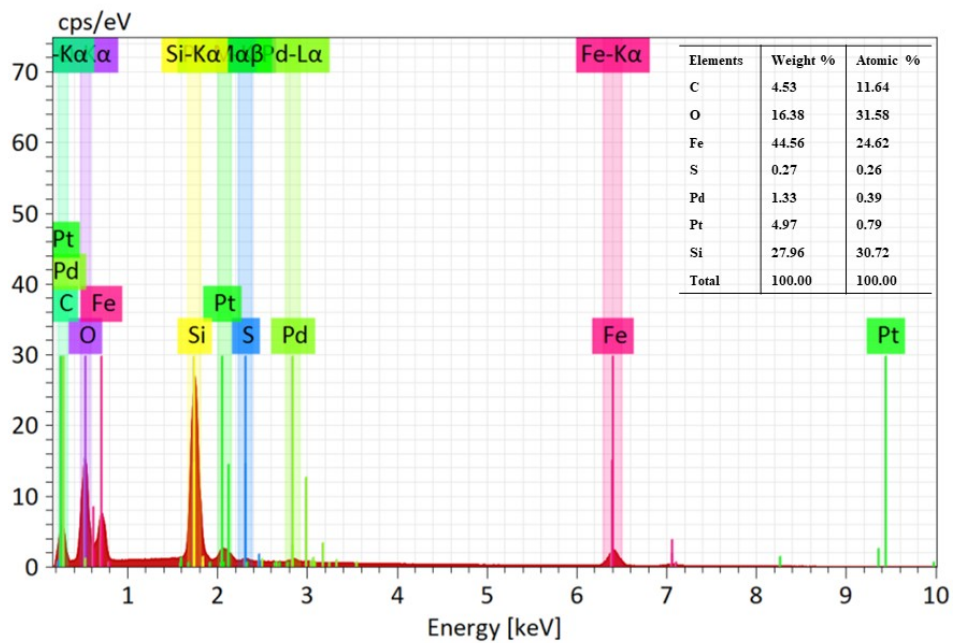

Fig. S1 EDS data of magCDP@Ada-MSA.

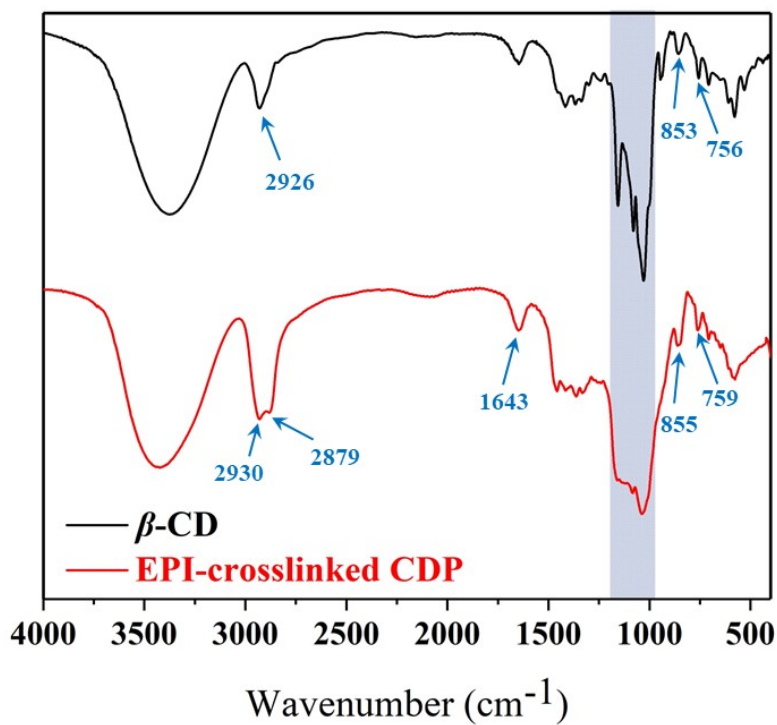

Fig. S2 FT-IR spectra of  $\beta$ -CD and EPI-crosslinked CDP.

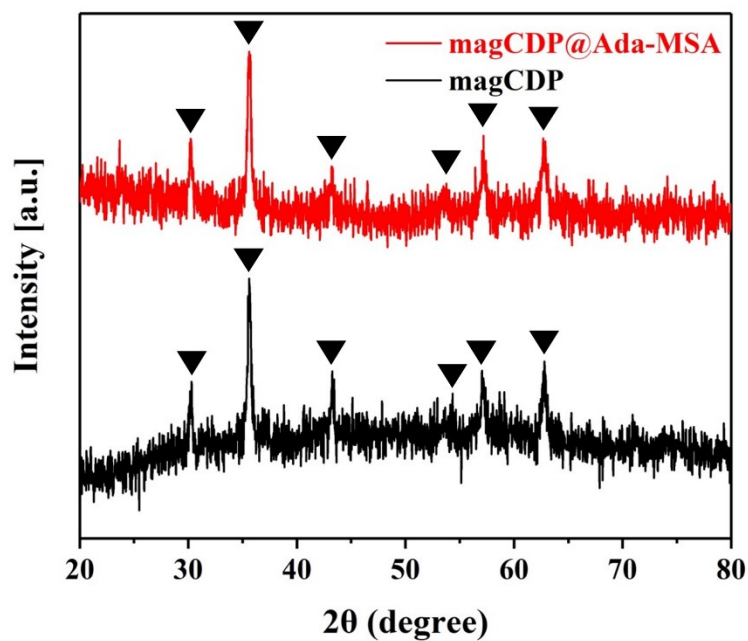

Fig. S3 XRD patterns of magCDP and magCDP@Ada-MSA. “▼” indicates the characteristic peaks of  $\text{Fe}_3\text{O}_4$ .

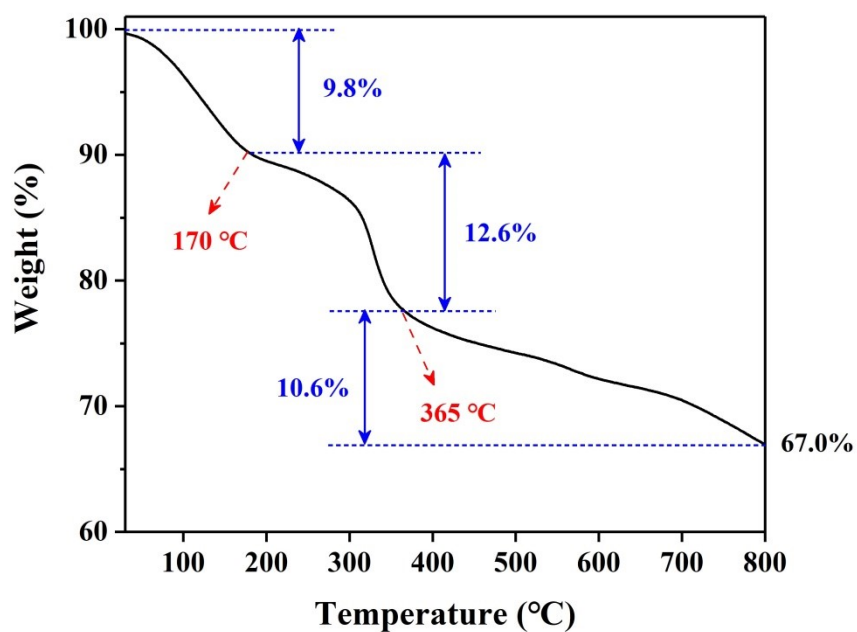

Fig. S4 TGA curve of magCDP@Ada-MSA.

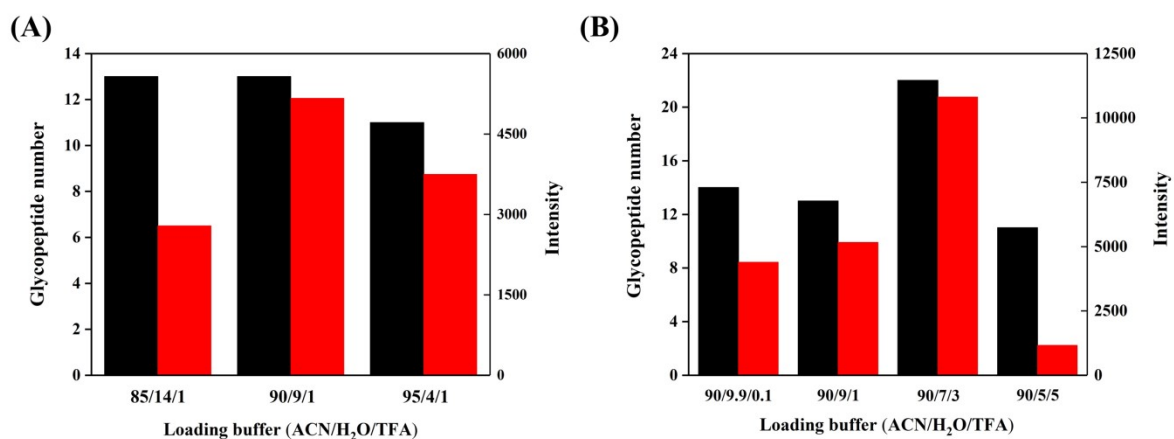

**Fig. S5** Effect of loading buffers containing different concentrations of (A) ACN and (B) TFA on glycopeptides enriched by magCDP@Ada-MSA.

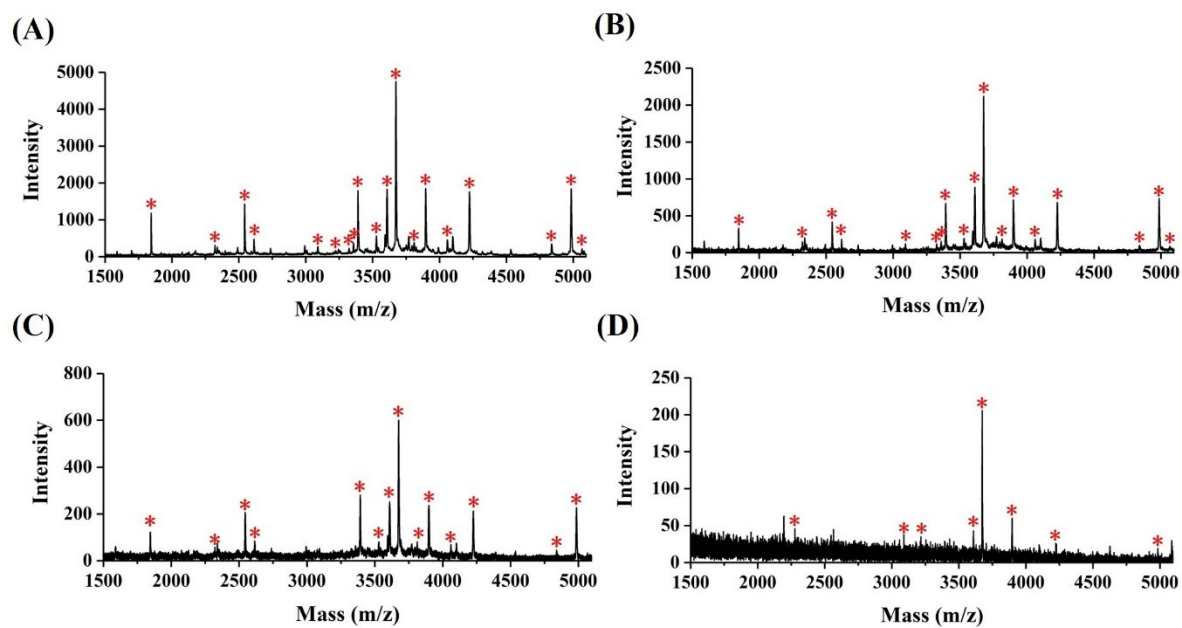

**Fig. S6** MALDI-TOF mass spectra of standard HRP tryptic digests with the concentration of (A) 100, (B) 10, (C) 1, and (D) 0.1 fmol μL<sup>-1</sup> treated by magCDP@Ada-MSA. “\*” indicates glycopeptide.

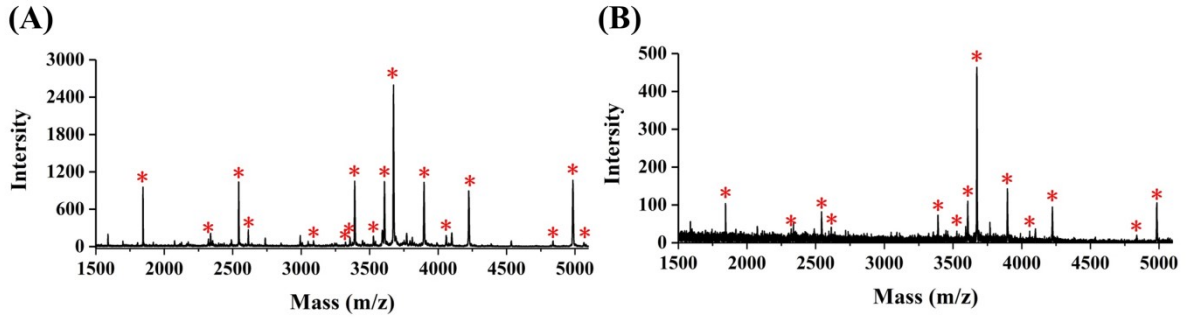

**Fig. S7** MALDI-TOF mass spectra of HRP tryptic digests after enrichment by magCDP (A) 100 and (b) 10 fmol  $\mu\text{L}^{-1}$ . “\*” indicates glycopeptide.

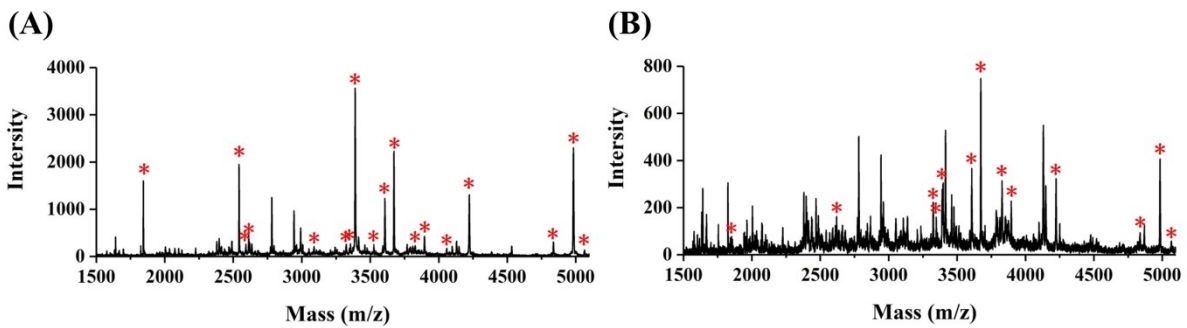

**Fig. S8** MALDI-TOF mass spectra of mixtures of HRP and BSA tryptic digests after enrichment by magCDP (a) 1:10 and (b) 1:50. “\*” indicates glycopeptide.

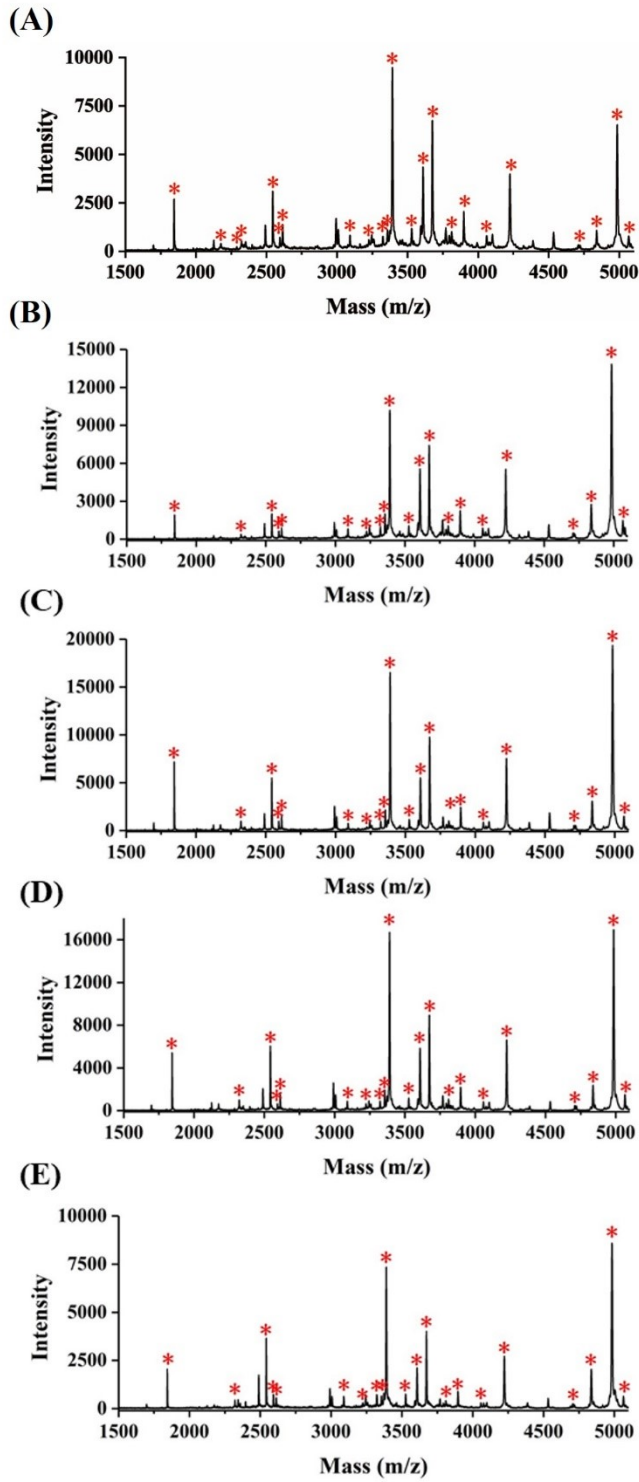

**Fig. S9** MALDI-TOF mass spectra of HRP tryptic digests after enrichment by magCDP@Ada-MSA: (A) for the first time, (B) for the third time, (C) for the fifth time, (D) for the seventh time, and (E) for the tenth time. “\*” indicates glycopeptide.

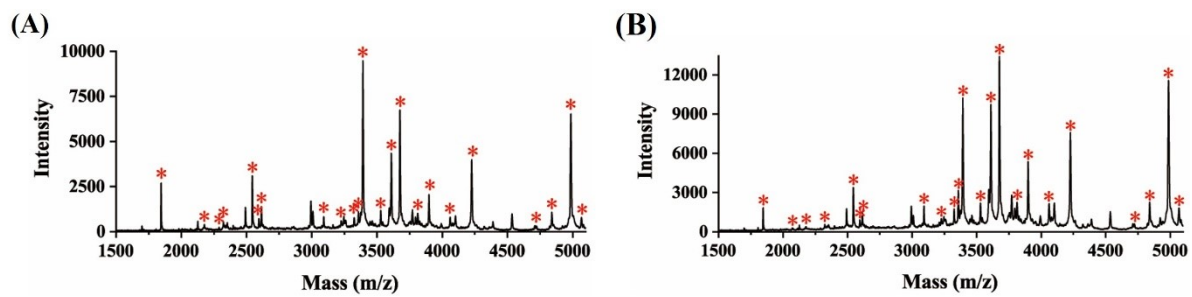

**Fig. S10** MALDI-TOF mass spectra of HRP tryptic digests after enrichment by magCDP@Ada-MSA: (a) before and (b) after storage for 3 months.

**Table S1** Detailed information about identified glycopeptides enriched from HRP digests by magCDP@Ada-MSA. N#: N-glycosylation site.

| magCDP@Ada-MSA |                |                                       |                                 |
|----------------|----------------|---------------------------------------|---------------------------------|
| Peak           | Observed (m/z) | Glycan composition                    | Amino acid sequence             |
| H1             | 1842.1         | XylMan3FucGlcNAc2                     | NVGLN#R                         |
| H2             | 2175.4         | Man3GlcNAc2Fuc                        | LYN#FSN#TGLP                    |
| H3             | 2290.6         | XylMan2GlcNAc2                        | SILLDN#TTSFR                    |
| H4             | 2318.7         | Man3GlcNAc2                           | PTLN#TTYLQTLR                   |
| H5             | 2543.2         | FucGlcNAc                             | SFAN#STQTFNFAFVEAMDR            |
| H6             | 2590.1         | XylMan3FucGlcNAc2                     | PTLN#TTYLQTLR                   |
| H7             | 2612.1         | XylMan3GlcNAc2                        | MGN#ITPLTGTQGQIR                |
| H8             | 3088.5         | XylMan3FucGlcNAc2                     | GLCPLNGN#LSALVDFDLR             |
| H9             | 3221.5         | XylMan3FucGlcNAc2                     | LHFHDCFVNGCDASILLDN#TTSFR       |
| H10            | 3321.9         | XylMan3FucGlcNAc2                     | QLTPTFYDNSC(AAVESACPR)PN#VSNIVR |
| H11            | 3354.5         | XylMan3FucGlcNAc2<br>XylMan 3GlcNAc 2 | LYN#FSNTGLPDPTLN#TTYLQTLR       |
| H12            | 3388.8         | XylHex6HexNAc4Fuc2                    | DSFRNVGLN#R                     |
| H13            | 3525.4         | XylMan3GlcNAc2                        | GLIQSDQELFSSPN#ATDTIPLVR        |
| H14            | 3607.8         | XylMan3GlcNAc2Fuc                     | NQCRGLCPLNGN#LSALVDFDLR         |
| H15            | 3671.9         | XylMan3GlcNAc2Fuc                     | GLIQSDQELFSSPN#ATDTIPLVR        |
| H16            | 3812.2         | XylMan3FucGlcNAc2                     | LHFHDCFVNGCDASILLDN#TTSFR       |
| H17            | 3895.1         | XylMan3GlcNAc2Fuc                     | LHFHDCFVNGCDASILLDN#TTSFR       |
| H18            | 4057.2         | XylMan4GlcNAc2Fuc                     | QLTPTFYDNSC(AAVESACPR)PN#VSNIVR |
| H19            | 4221.8         | XylMan3GlcNAc2Fuc                     | QLTPTFYDNSC(AAVESACPR)PN#VSNIVR |
| H20            | 4720.9         | Man3FucGlcNAc2<br>Man3FucGlcNAc2      | LYN#FSNTGLPDPTLN#TTYLQTLR       |
| H21            | 4838.5         | XylMan3FucGlcNAc2<br>XylMan3GlcNAc2   | LYN#FSNTGLPDPTLN#TTYLQTLR       |
| H22            | 4984.7         | XylMan3GlcNAc2Fuc                     | LYN#FSNTGLPDPTLN#TTYLQTLR       |
| H23            | 5066.0         | Xyl Man3GlcNAc2                       | QLTPTFYDNSC(AAVESACPR)PN#VSNIVR |
| magCDP         |                |                                       |                                 |
| Peak           | Observed (m/z) | Glycan composition                    | Amino acid sequence             |
| H1             | 1842.8         | XylMan3FucGlcNAc2                     | NVGLN#R                         |
| H2             | 2321.9         | Man3GlcNAc2                           | PTLN#TTYLQTLR                   |
| H3             | 2542.3         | FucGlcNAc                             | SFAN#STQTFNFAFVEAMDR            |
| H4             | 2592.4         | XylMan3FucGlcNAc2                     | PTLN#TTYLQTLR                   |
| H5             | 2612.7         | XylMan3GlcNAc2                        | MGN#ITPLTGTQGQIR                |
| H6             | 3088.9         | XylMan3FucGlcNAc2                     | GLCPLNGN#LSALVDFDLR             |
| H7             | 3323.6         | XylMan3FucGlcNAc2                     | QLTPTFYDNSC(AAVESACPR)PN#VSNIVR |
| H8             | 3355.3         | XylMan3FucGlcNAc2<br>XylMan 3GlcNAc 2 | LYN#FSNTGLPDPTLN#TTYLQTLR       |



---

|     |        |                                     |                                 |
|-----|--------|-------------------------------------|---------------------------------|
| H9  | 3388.0 | XylHex6HexNAc4Fuc2                  | DSFRNVGLN#R                     |
| H10 | 3526.5 | XylMan3GlcNAc2                      | GLIQSDQELFSSPN#ATDTIPLVR        |
| H11 | 3606.9 | XylMan3GlcNAc2Fuc                   | NQCRGLCPLNGN#LSALVDFDLR         |
| H12 | 3673.1 | XylMan3GlcNAc2Fuc                   | GLIQSDQELFSSPN#ATDTIPLVR        |
| H13 | 3896.1 | XylMan3GlcNAc2Fuc                   | LHFHDCFVNGCDASILLDN#TTSFR       |
| H14 | 4057.3 | XylMan4GlcNAc2Fuc                   | QLTPTFYDNSC(AAVESACPR)PN#VSNIVR |
| H15 | 4223.1 | XylMan3GlcNAc2Fuc                   | QLTPTFYDNSC(AAVESACPR)PN#VSNIVR |
| H16 | 4837.8 | XylMan3FucGlcNAc2<br>XylMan3GlcNAc2 | LYN#FSNTGLPDPTLN#TTYLQTLR       |
| H17 | 4983.2 | XylMan3GlcNAc2Fuc                   | LYN#FSNTGLPDPTLN#TTYLQTLR       |
| H18 | 5065.9 | Xyl Man3GlcNAc2                     | QLTPTFYDNSC(AAVESACPR)PN#VSNIVR |

---

**Table S2** Detailed information about identified glycopeptides enriched from human serum by magCDP@Ada-MSA. N#: N-glycosylation site.

| Peak | Observed (m/z) | Amino acid sequence         |
|------|----------------|-----------------------------|
| 1    | 1528.3         | cIQAN#YSLMENGK              |
| 2    | 1535.8         | LLDLSGNN#LTHLPK             |
| 3    | 1640.9         | TKPREEQFN#STFR              |
| 4    | 1678.1         | VTAcHSSQPN#ATLYK            |
| 5    | 1719.0         | QVHFFVN#ASDVDNVK            |
| 6    | 1778.4         | SLPNFPN#TSATAN#ATGGR        |
| 7    | 1820.8         | VFHIHN#ESWVLLTPK            |
| 8    | 1883.9         | LHINHNN#LTESVGPLPK          |
| 9    | 1894.1         | EHEGAIYPDND#TTDFQR          |
| 10   | 1920.4         | SVVAPATDGGLN#LTSTFLR        |
| 11   | 1974.9         | cATPHGDN#ASLEATFVKR         |
| 12   | 1987.6         | LQAILGVPWKDKN#cTSR          |
| 13   | 1999.0         | N#EcFLQHKDDN#PNLPR          |
| 14   | 2023.5         | ELHHLQEQN#VSNAFLDK          |
| 15   | 2046.0         | LSDLSIN#STEcLHVHcR          |
| 16   | 2149.2         | IIVPLNNREN#ISDPTSPLR        |
| 17   | 2165.4         | VSN#QTLSLFFTVLQDVPVR        |
| 18   | 2233.1         | LDAPTNLQFVN#ETDSTVLVR       |
| 19   | 2278.8         | IYSN#HSALESLALIPLQAPLK      |
| 20   | 2401.4         | FN#LTETSEAEIHQSFQHLLR       |
| 21   | 2414.9         | AAPAPQEATATFN#STADREDGHR    |
| 22   | 2449.8         | GLQPTLTNPGEcRPN#FTcAcR      |
| 23   | 2458.1         | ALGISPFHEHAEVVFTAN#DSGPR    |
| 24   | 2488.9         | KEHETcLAPELYN#GN#YSTTQK     |
| 25   | 2562.8         | KcPLPEN#ITHILVHGDDFSVNR     |
| 26   | 2606.1         | ALGISPFHEHAEVVFTAN#DSGPRR   |
| 27   | 2622.1         | HGIQYFNN#NTQHSSLFmLNEVK     |
| 28   | 2635.8         | QLVEIEKVVLHPN#YSQVDIGLIK    |
| 29   | 2763.9         | EEQFN#STFR                  |
| 30   | 2780.8         | ITYSIVQTN#cSKEN#FLFLTPDcK   |
| 31   | 2796.0         | HGIQYFnN#NTQHSSLFmLNEVKR    |
| 32   | 2841.9         | FVEGSHN#STVSLTTK            |
| 33   | 2903.8         | ELHHLQEQN#VSNAFLDKGEFYIGSK  |
| 34   | 2929.8         | IcDLLVANNHFAHFFAPQN#LTNMNK  |
| 35   | 2958.0         | SRYPHKPEIN#STTHPGADLQEN#FcR |

---

|    |        |                                     |
|----|--------|-------------------------------------|
| 36 | 2980.9 | EEQYN#STYRVVSVLTVLHQDWLN#GK         |
| 37 | 3007.9 | SIPAcVPWSPYLFQPN#DTcIVSGWGR         |
| 38 | 3051.7 | N#LSSLESVQLDHN#QLETLPGDVFGALPR      |
| 39 | 3165.1 | GYTLAGDKESScLAN#SSWSHSPPVcEPVK      |
| 40 | 3183.5 | QLAHQSN#STnIFFSPVSIATAFAMLSLGTK     |
| 41 | 3205.2 | GGnSnGALcHFPFLYNNHN#YTDcTSEGR       |
| 42 | 3220.0 | LSHNELADSGIPGNSFN#VSSLVELDLSYNK     |
| 43 | 3355.3 | DTAVFEcLPQHAMFGN#DTITcTTHGN#WTK     |
| 44 | 3373.9 | FSLLGHASIScTVEN#ETIGVWRPSPTcEK      |
| 45 | 3399.8 | EEQYN#STYRVVSVLTVLHQDWLN#GKEYK      |
| 46 | 3455.8 | NSVLN#SSTAETHSPYSEDPIEDPLQPDVTGIR   |
| 47 | 3531.6 | ncGVN#cSGDVFTALIGEIASPN#YPKPYPEN#SR |
| 48 | 3552.1 | QVFPGLN#YcTSGAYSN#ASSTDSASYPLTGDTR  |

---

**Table S3** Detailed information about identified glycopeptides enriched from human saliva by magCDP@Ada-MSA. N#: N-glycosylation site.

| Peak | Observed (m/z) | Amino acid sequence        |
|------|----------------|----------------------------|
| 1    | 827.7          | AIN#DTAAR                  |
| 2    | 953.6          | TPLTAN#ITK                 |
| 3    | 970.9          | INGN#cTGIK                 |
| 4    | 1155.1         | EEQFN#STFR                 |
| 5    | 1170.3         | EEQFN#STYR                 |
| 6    | 1189.8         | EEQYN#STYR                 |
| 7    | 1227.1         | EN#ISDPTSPLR               |
| 8    | 1282.0         | YKN#NSDISSTR               |
| 9    | 1398.1         | VPGN#VTAVLGETLK            |
| 10   | 1407.9         | GLN#LTEDTYKPR              |
| 11   | 1463.5         | NLFLN#HSEN#ATAK            |
| 12   | 1524.6         | LVNLN#SSYGLcAGR            |
| 13   | 1537.2         | ADEGSLKN#ISIIYTK           |
| 14   | 1548.0         | YDFN#SSmLYSTAK             |
| 15   | 1564.5         | ISEEN#ETTcYMGK             |
| 16   | 1604.5         | FVEGSHN#STVSLTTK           |
| 17   | 1666.2         | HYTN#SSQDVTVPcR            |
| 18   | 1680.1         | N#GIYN#ITVLASDQGGR         |
| 19   | 1735.5         | ALPQPQN#VTSLLGcTH          |
| 20   | 1772.0         | VcQDcPLLAPLN#DTR           |
| 21   | 1795.3         | VVLHPN#YSQVDIGLIK          |
| 22   | 1855.9         | N#GTGHGN#STHHGPEYMR        |
| 23   | 1868.0         | LGAcN#DTLQQLMEVFK          |
| 24   | 1892.3         | EHEGAIYPDN#TTDFQR          |
| 25   | 1903.5         | FGcEIEN#NRSSGAFWK          |
| 26   | 1924.4         | QnQcFYN#SSYLVNQR           |
| 27   | 2068.0         | DIVEYYN#DSN#GSHVLQGR       |
| 28   | 2078.1         | AFGQFFSPGEVIYN#KTDR        |
| 29   | 2093.2         | NPVGLIGAEN#ATGETDPSHSK     |
| 30   | 2167.0         | VS N#QTLSLFFTVLQDVPVR      |
| 31   | 2192.9         | LGSFEGLVN#LTFIHLQHNR       |
| 32   | 2207.3         | DVQIIVFPEDGIHGFN#FTR       |
| 33   | 2248.5         | LQAPLN#YTEFQKPIcLPSK       |
| 34   | 2256.5         | ADGTVNQIEGEATPVN#LTEPAK    |
| 35   | 2317.0         | LYLGSN#NLTAHPALFQN#LSK     |
| 36   | 2340.3         | GLTFQQN#ASSMcVPDQDAIR      |
| 37   | 2425.5         | VPGN#VTAVLGETLKVcHFPcK     |
| 38   | 2451.9         | ALGISPFHEHAEVVFTAN#DSGPR   |
| 39   | 2611.2         | LGHcPDPVLVNGEFSSSGPVN#VSDK |
| 40   | 2739.1         | LFGDKSLTFN#ETYQDISELVYGAK  |

**Table S4.** Comparison of the numbers of glycopeptides captured from complex biological samples by magCDP@Ada-MSA with other reports.

| Materials                                              | Sample       | Detection Method | Number of glycopeptides | Ref.      |
|--------------------------------------------------------|--------------|------------------|-------------------------|-----------|
| FSAu@mSiO <sub>2</sub> @L-Cys                          | Human saliva | LC-MS/MS         | 40                      | 1         |
| SiO <sub>2</sub> @L-Cys capillary packed columns       | Human saliva | LC-MS/MS         | 69                      | 2         |
| Fe <sub>3</sub> O <sub>4</sub> @mTiO <sub>2</sub> -MSA | Human saliva | Nano-LC-MS/MS    | 65                      | 3         |
| Fe <sub>3</sub> O <sub>4</sub> @Au-GSH                 | Human serum  | MALDI-TOF MS     | 22                      | 4         |
| Fe <sub>3</sub> O <sub>4</sub> @TA@Ag@L-Cys            | Human serum  | MALDI-TOF MS     | 56                      | 5         |
|                                                        | Human saliva |                  | 37                      |           |
| magCDP@Ada-MSA                                         | Human serum  | MALDI-TOF MS     | 48                      | This work |
|                                                        | Human saliva |                  | 40                      |           |

## References

1. Z. Wang, R. Wu, H. Chen, N. Sun and C. Deng, *Nanoscale*, 2018, **10**, 5335-5341.
2. Y. Wu, H. Lin, Z. Xu, Y. Li, Z. Chen and C. Deng, *Anal. Chim. Acta*, 2020, **1096**, 1-8.
3. N. R. Sun, J. W. Wang, J. Z. Yao, H. M. Chen and C. H. Deng, *Microchim. Acta*, 2019, **186**, 159.
4. H. Qi, Z. Li, H. J. Zheng, L. Fu and Q. Jia, *Chin. Chem. Lett.*, 2019, **30**, 2181-2185.
5. Y. X. Wang, W. H. Xu, H. Xu and Q. Jia, *Anal. Methods*, 2022, DOI: 10.1039/d2ay01169g.
